# Supplementary material
Source: HighWire-hosted journal article supplement (https://informatics.bmj.com/content/30/1/e100842)
Supplement: inline-supplementary-material-1 [file inline-supplementary-material-1.pdf]

# eAppendix1: CONSORT Checklist

Based on the CONSORT guidelines.

|                           |                     | Reporting Item                                                                                                                                                 | Page Number |
|---------------------------|---------------------|----------------------------------------------------------------------------------------------------------------------------------------------------------------|-------------|
| <b>Title and Abstract</b> |                     |                                                                                                                                                                |             |
| Title                     | <a href="#">#1a</a> | Identification as a randomized trial in the title.                                                                                                             | 1           |
| Abstract                  | <a href="#">#1b</a> | Structured summary of trial design, methods, results, and conclusions                                                                                          | 3           |
| <b>Introduction</b>       |                     |                                                                                                                                                                |             |
| Background and objectives | <a href="#">#2a</a> | Scientific background and explanation of rationale                                                                                                             | 4           |
| Background and objectives | <a href="#">#2b</a> | Specific objectives or hypothesis                                                                                                                              | 4           |
| <b>Methods</b>            |                     |                                                                                                                                                                |             |
| Trial design              | <a href="#">#3a</a> | Description of trial design (such as parallel, factorial) including allocation ratio.                                                                          | 4           |
| Trial design              | <a href="#">#3b</a> | Important changes to methods after trial commencement (such as eligibility criteria), with reasons                                                             | 4           |
| Participants              | <a href="#">#4a</a> | Eligibility criteria for participants                                                                                                                          | 5           |
| Participants              | <a href="#">#4b</a> | Settings and locations where the data were collected                                                                                                           | 5           |
| Interventions             | <a href="#">#5</a>  | The experimental and control interventions for each group with sufficient details to allow replication, including how and when they were actually administered | 5           |

|                                                        |                      |                                                                                                                                                                                             |           |
|--------------------------------------------------------|----------------------|---------------------------------------------------------------------------------------------------------------------------------------------------------------------------------------------|-----------|
| Outcomes                                               | <a href="#">#6a</a>  | Completely defined prespecified primary and secondary outcome measures, including how and when they were assessed                                                                           | 6         |
| Outcomes                                               | <a href="#">#6b</a>  | Any changes to trial outcomes after the trial commenced, with reasons                                                                                                                       | 5-6       |
| Sample size                                            | <a href="#">#7a</a>  | How sample size was determined.                                                                                                                                                             | eAppendix |
| Sample size                                            | <a href="#">#7b</a>  | When applicable, explanation of any interim analyses and stopping guidelines                                                                                                                | n/a       |
| Randomization -<br>Sequence generation                 | <a href="#">#8a</a>  | Method used to generate the random allocation sequence.                                                                                                                                     | 4         |
| Randomization -<br>Sequence generation                 | <a href="#">#8b</a>  | Type of randomization; details of any restriction (such as blocking and block size)                                                                                                         | 5         |
| Randomization -<br>Allocation concealment<br>mechanism | <a href="#">#9</a>   | Mechanism used to implement the random allocation sequence (such as sequentially numbered containers), describing any steps taken to conceal the sequence until interventions were assigned | 5         |
| Randomization -<br>Implementation                      | <a href="#">#10</a>  | Who generated the allocation sequence, who enrolled participants, and who assigned participants to interventions                                                                            | 5         |
| Blinding                                               | <a href="#">#11a</a> | If done, who was blinded after assignment to interventions (for example, participants, care providers, those assessing outcomes) and how.                                                   | n/a       |
| Blinding                                               | <a href="#">#11b</a> | If relevant, description of the similarity of interventions                                                                                                                                 | n/a       |
| Statistical methods                                    | <a href="#">#12a</a> | Statistical methods used to compare groups for primary and secondary outcomes                                                                                                               | 6         |
| Statistical methods                                    | <a href="#">#12b</a> | Methods for additional analyses, such as subgroup analyses and adjusted analyses                                                                                                            | 6         |

## Results

|                                                 |                      |                                                                                                                                                   |               |
|-------------------------------------------------|----------------------|---------------------------------------------------------------------------------------------------------------------------------------------------|---------------|
| Participant flow diagram (strongly recommended) | <a href="#">#13a</a> | For each group, the numbers of participants who were randomly assigned, received intended treatment, and were analysed for the primary outcome    | 6             |
| Participant flow                                | <a href="#">#13b</a> | For each group, losses and exclusions after randomization, together with reason                                                                   | 6             |
| Recruitment                                     | <a href="#">#14a</a> | Dates defining the periods of recruitment and follow-up                                                                                           | 4             |
| Recruitment                                     | <a href="#">#14b</a> | Why the trial ended or was stopped                                                                                                                | 4             |
| Baseline data                                   | <a href="#">#15</a>  | A table showing baseline demographic and clinical characteristics for each group                                                                  | 13, eAppendix |
| Numbers analysed                                | <a href="#">#16</a>  | For each group, number of participants (denominator) included in each analysis and whether the analysis was by original assigned groups           | 6, 13         |
| Outcomes and estimation                         | <a href="#">#17a</a> | For each primary and secondary outcome, results for each group, and the estimated effect size and its precision (such as 95% confidence interval) | 6, 7          |
| Outcomes and estimation                         | <a href="#">#17b</a> | For binary outcomes, presentation of both absolute and relative effect sizes is recommended                                                       | 6, 7          |
| Ancillary analyses                              | <a href="#">#18</a>  | Results of any other analyses performed, including subgroup analyses and adjusted analyses, distinguishing pre-specified from exploratory         | 7, 13         |
| Harms                                           | <a href="#">#19</a>  | All important harms or unintended effects in each group (For specific guidance see CONSORT for harms)                                             | 7, 14         |

## Discussion

|             |                     |                                                                                                                  |   |
|-------------|---------------------|------------------------------------------------------------------------------------------------------------------|---|
| Limitations | <a href="#">#20</a> | Trial limitations, addressing sources of potential bias, imprecision, and, if relevant, multiplicity of analyses | 8 |
|-------------|---------------------|------------------------------------------------------------------------------------------------------------------|---|

|                          |                     |                                                                                                               |      |
|--------------------------|---------------------|---------------------------------------------------------------------------------------------------------------|------|
| Generalisability         | <a href="#">#21</a> | Generalisability (external validity, applicability) of the trial findings                                     | 8    |
| Interpretation           | <a href="#">#22</a> | Interpretation consistent with results, balancing benefits and harms, and considering other relevant evidence | 9    |
| Registration             | <a href="#">#23</a> | Registration number and name of trial registry                                                                | n/a  |
| <b>Other information</b> |                     |                                                                                                               |      |
| Interpretation           | <a href="#">#22</a> | Interpretation consistent with results, balancing benefits and harms, and considering other relevant evidence | 8, 9 |
| Registration             | <a href="#">#23</a> | Registration number and name of trial registry                                                                | n/a  |
| Protocol                 | <a href="#">#24</a> | Where the full trial protocol can be accessed, if available                                                   | n/a  |
| Funding                  | <a href="#">#25</a> | Sources of funding and other support (such as supply of drugs), role of funders                               | 10   |

None The CONSORT checklist is distributed under the terms of the Creative Commons Attribution License CC-BY. This checklist can be completed online using <https://www.goodreports.org/>, a tool made by the [EQUATOR Network](#) in collaboration with [Penelope.ai](#)
